# Supplementary material for: Human Cytomegalovirus Antigen Presentation by HLA-DR+ NKG2C+ Adaptive NK Cells Specifically Activates Polyfunctional Effector Memory CD4+ T Lymphocytes
Source: PubMed Central journal article supplement (PMC6456717; doi:10.3389/fimmu.2019.00687), 2019-04-03
Supplement: Image_1.pdf [file Image_1.pdf]

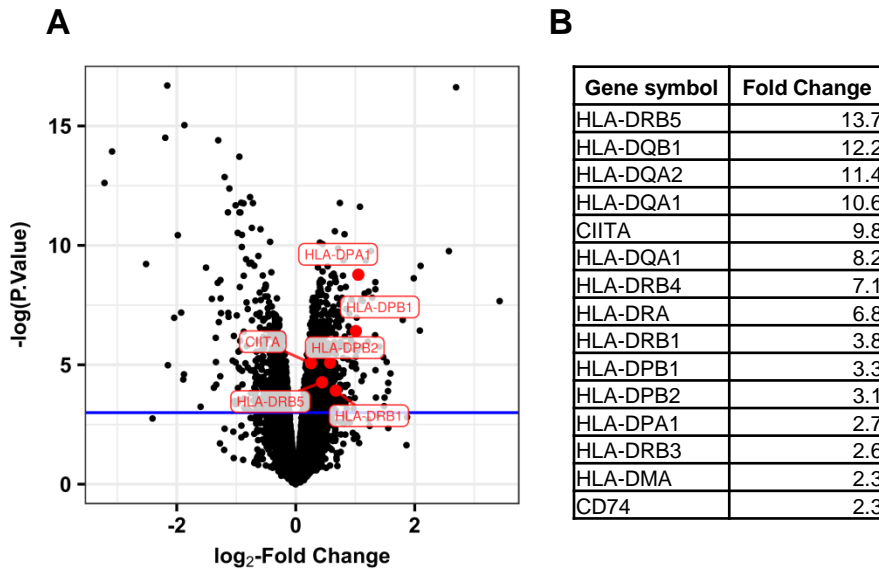

**Supplementary figure 1: Differential expression of genes involved in antigen presentation by MHC class II in adaptive NKG2C+ NK cells.** Publicly available gene expression data was obtained from NIH GEO Accession GSE66564 (24) and GSE66124 (25). Already normalized data was log<sub>2</sub> transformed, linear model was designed using R limma package and a moderated t-test between the two population groups was applied for paired-wise comparison using eBayes function. A volcano plot of the modelled data was generated using the ggplot2 package.

**A)** Re-analysis of the available microarray data published in Schlums et al. Immunity. 2015. Volcano plot showing fold-change of gene expression in NKG2C+ CD57<sup>bright</sup> compared to NKG2A+ CD57<sup>-</sup> CD56<sup>dim</sup> NK cells. Blue horizontal line indicates a p-value of 0.05 and selected genes are labeled. **B)** Table extracted from the gene expression microarray analysis data published by Lee et al. Immunity. 2015. comparing sorted NKG2C+ versus NKG2C<sup>-</sup> NK cells from a donor displaying expansions of adaptive NK cells.

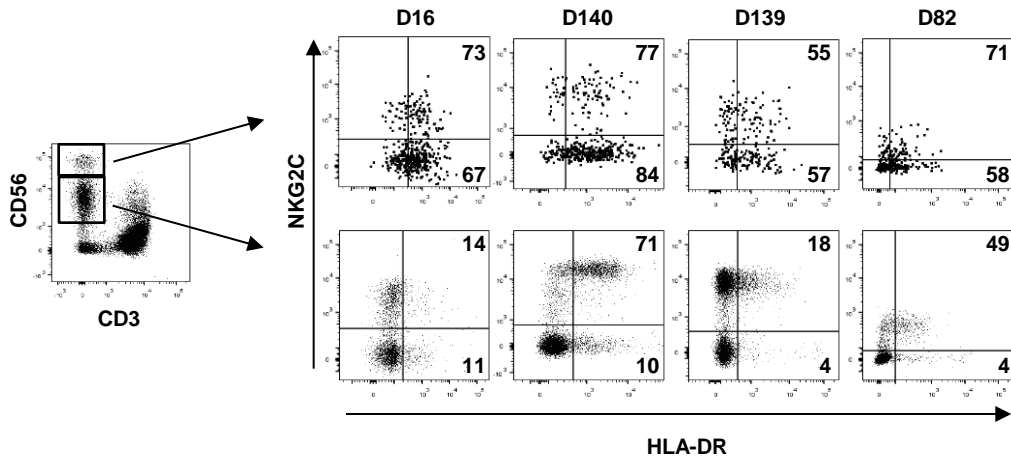

**Supplementary figure 2: NKG2C and HLA-DR co-expression in CD56<sup>bright</sup> and CD56<sup>dim</sup> NK cells.** Representative dot plots of NKG2C and HLA-DR expression in circulating CD56<sup>bright</sup> and CD56<sup>dim</sup> NK cells from seropositive individuals with adaptive NKG2C+ NK cell expansions. Inset numbers indicate the percentage of HLA-DR+ cells in NKG2C+ and NKG2C- subpopulations.

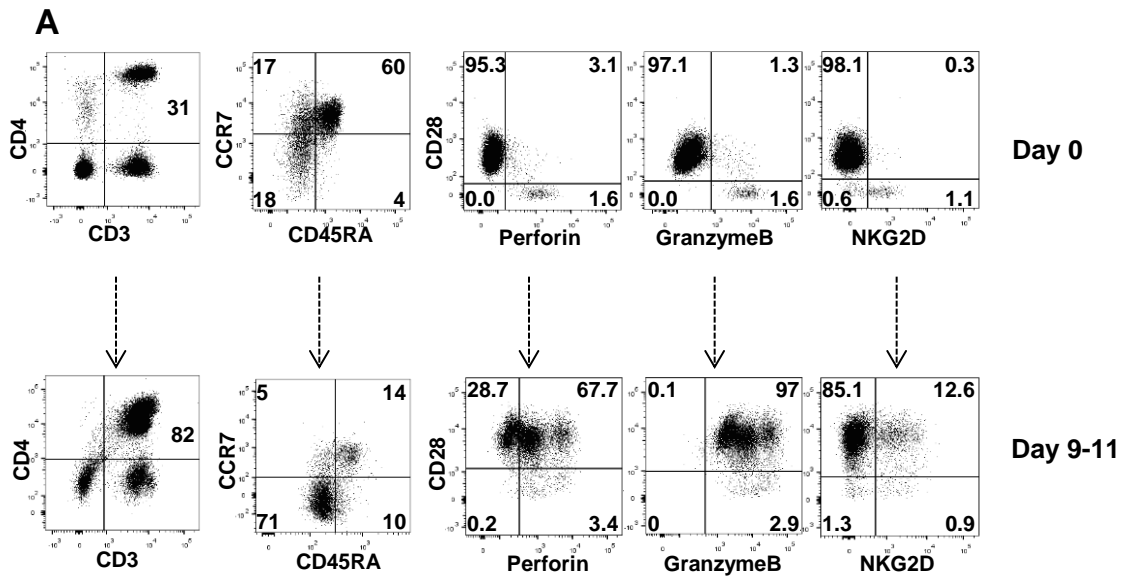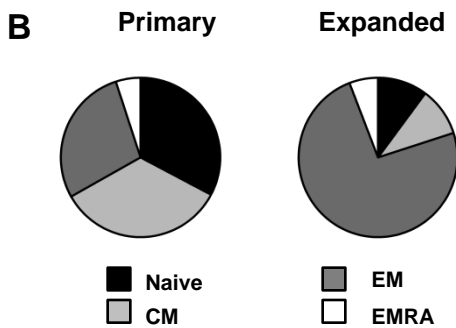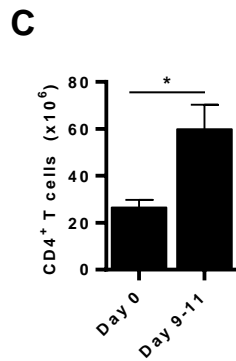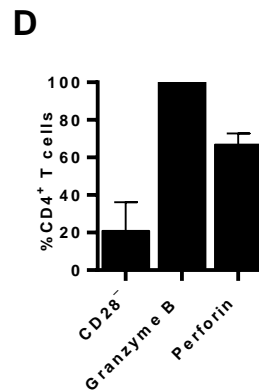

**Supplementary Figure 3. Cytotoxic CD4<sup>+</sup> T cells expand upon PBMC co-culture with HCMV.** CD4<sup>+</sup> T cells were expanded by co-culturing PBMC from seropositive donors with HCMV particles (MOI = 0.3) for 9-11 days with 25 U/ml IL-2. **A)** Dot plots showing CD45RA, CCR7 and CD28 expression versus perforin, granzyme B and NKG2D in CD4<sup>+</sup> T cells prior and after stimulation with HCMV. Data correspond to a representative expansion. **B)** Pie charts showing the distribution of T cell subpopulations based on CCR7 and CD45RA expression prior and after expansion (mean, n=4). **C)** Average CD4<sup>+</sup> T cell numbers prior and after expansion (mean+SEM, n=6). **D)** Frequency of CD28<sup>-</sup>, perforin<sup>+</sup> and granzyme B<sup>+</sup> CD4<sup>+</sup> T cells after expansion (mean+SEM, n=4).

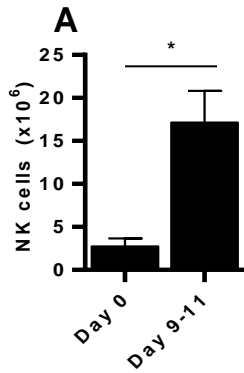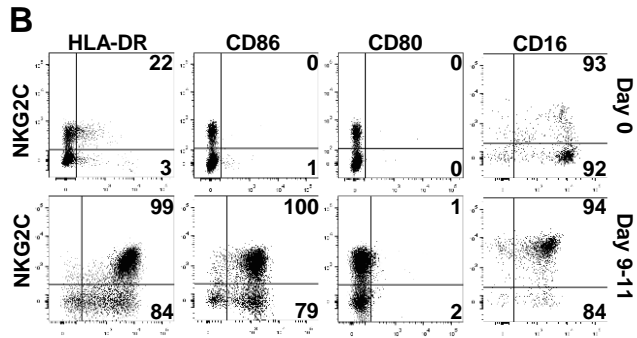

**Supplementary Figure 4. NKG2C<sup>+</sup> HLA-DR<sup>+</sup> NK cell expansion with the HLA-E<sup>+</sup> 721.221-AEH cell line.** PBMC were cultured with irradiated 721.221-AEH lymphoblastoid cells for 9-11 days. **A)** Average NK cell numbers obtained upon expansion (mean+SEM, n=4). **B)** Dot plots displaying HLA-DR, CD86, CD80, CD16 and NKG2C in NK cells at days 0 and 9-11 (\*p < 0.05).

| Donor       | HLA-DRB1-1 | HLA-DRB1-2 | HLA-DQB1-1 | HLA-DQB1-2 | HLA-DPB1-1 | HLA-DPB1-2 | %TNF $\alpha$ +<br>IFN $\gamma$ + NK | %TNF $\alpha$ +<br>IFN $\gamma$ + DC |
|-------------|------------|------------|------------|------------|------------|------------|--------------------------------------|--------------------------------------|
| <b>D16</b>  | 11:04      |            | 03:01      |            | 02:01      | 04:02      | 0.23                                 | 0.6                                  |
| <b>D28</b>  | 07:01      |            | 02:02      | 03:03      | 04:01      | 13:01      | 0.061                                | 0.45                                 |
| <b>D67</b>  | 07:01      | 13:02      | 02:02      | 06:04      | 01:01      | 02:01      | 0.43                                 | 1.22                                 |
| <b>D117</b> | 07:01      | 11:01      | 02:02      | 03:01      | 04:01      |            | 0.32                                 | 2.42                                 |
| <b>D104</b> | 03:01      | 07:01      | 02:01      | 02:02      | 04:01      | 04:02      | 0.744                                |                                      |
| <b>D82</b>  | 03:01      | 08:02      | 02:01      | 04:02      | 04:01      | 02:01      | 0.35                                 | 1.48                                 |

**Supplementary Table I. HLA class II genotype in individuals displaying expansions of HLA-DR+NKG2C+ adaptive NK cells.** Last two columns indicate the percentage of CD4+ T cells producing TNF $\alpha$  and IFN $\gamma$  in antigen-presentation assays using NK cells or DC as APCs.
